# Supplementary material
Source: PubMed Central journal article supplement (PMC8265612)
Supplement: NIHMS1715934-supplement-Supplemental_Figure.pdf [file NIHMS1715934-supplement-Supplemental_Figure.pdf]

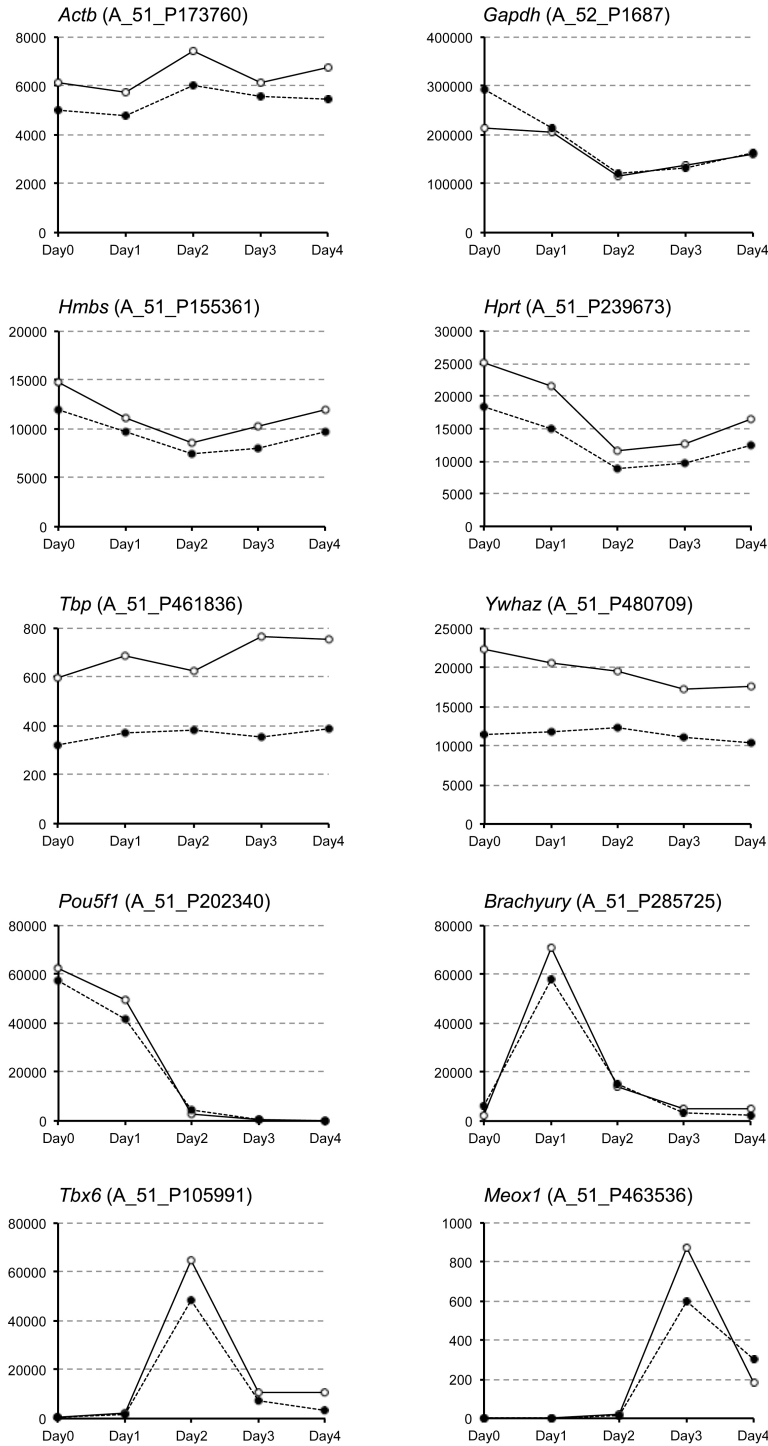

**Supplementary Figure.** Transcript levels of commonly used housekeeping genes (*Actb*, *Gapdh*, *Hmbs*, *Hprt*, *Tbp*, and *Ywhaz*) and developmentally regulated genes (*Pou5f1*, *Brachyury*, *Tbx6*, and *Meox1*) in P19C5 gastruloids, based on the previously reported microarray data (Kim and Marikawa, 2018). Probe ID of the Whole Mouse Genome Microarray (G4122F; Agilent Technologies, Santa Clara, CA) is shown in parentheses. Solid and dashed lines represent two independent biological replicates.
